# Supplementary material for: Response of microbial community of surface and deep chlorophyll maximum to nutrients and light in South China Sea
Source: Frontiers journal article supplement (doi:10.3389/fmars.2023.1122765), 2023-03-09
Supplement: Data_Sheet_1.docx [file Data_Sheet_1.docx]

Supplementary Material

Response of microbial community of surface and deep chlorophyll maximum to nutrients and light in South China Sea

Fahui Gong, Yafeng Zhang, Wei Xie, Xiuqin Wu, Han Zhang, Suixuan huang, Jun Gong*, Kedong Yin*

*** Correspondences:**

Kedong Yin

yinkd@mail.sysu.edu.cn

Jun Gong

gongj27@mail.sysu.edu.cn

# Supplementary Figures and Tables

## Supplementary Figures

**
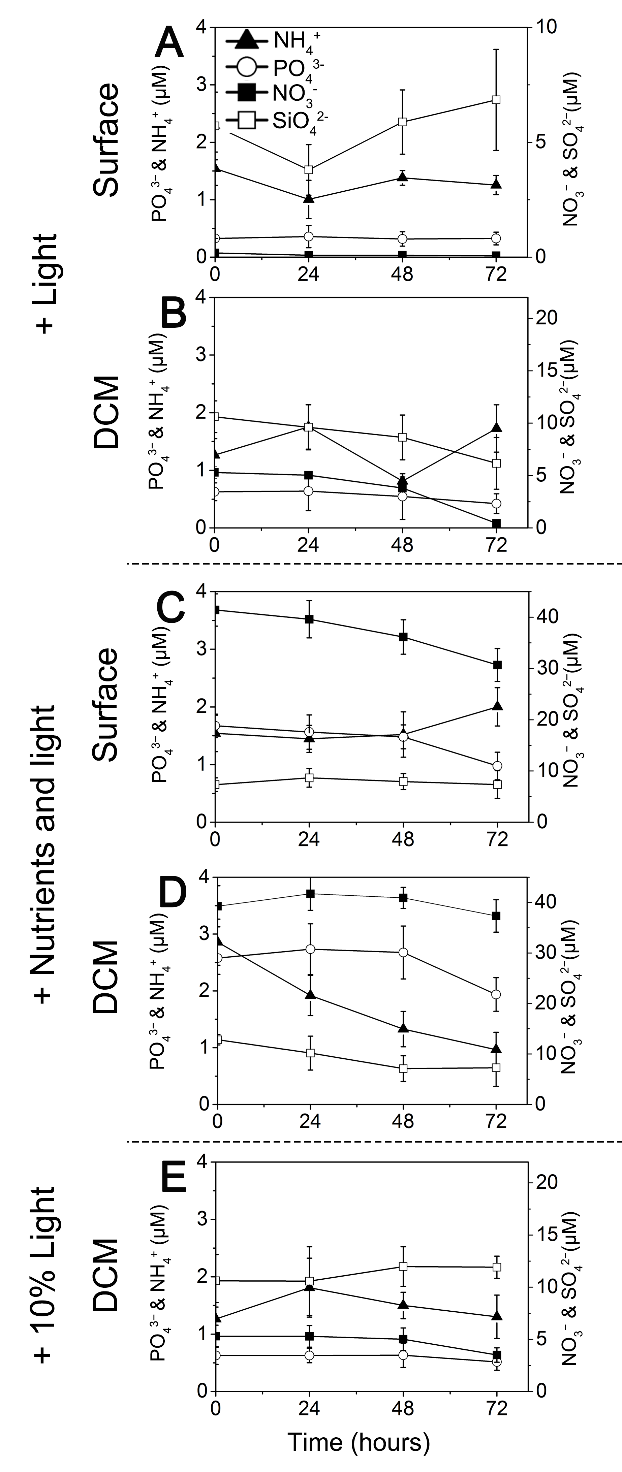
**

**Supplementary Figure 1.** Time course of the concentrations of NO3−, NH4+, PO43− and SiO42− during the field incubation experiments.

## Supplementary Tables

**Supplementary Table 1.** Water quality parameters in the station B6.

| **Depth**  **(m)** | **Salinity** | **Temperature**  **(°C)** | **DO**  **(mg L−1)** | **pH** | **Chl a**  **(μg L−1)** | **NH4+**  **(µM)** | **PO43−**  **(µM)** | **NO2− (µM)** | **NO3− (µM)** | **SiO42− (µM)** | **DIN**  **(µM)** | **N: P** | **N: Si** |
| --- | --- | --- | --- | --- | --- | --- | --- | --- | --- | --- | --- | --- | --- |
| **2** | 34.02 | 29.05 | 6.54 | 8.17 | 0.06 | 1.54 | 0.32 | 0.01 | 0.18 | 5.71 | 1.74 | 5.40 | 0.30 |
| 10 | 34.03 | 29.03 | 6.49 | 8.19 | 0.07 | 1.25 | 0.08 | 0.04 | 0.71 | 6.65 | 1.99 | 24.62 | 0.30 |
| 20 | 34.30 | 28.22 | 6.49 | 8.19 | 0.07 | 1.18 | 0.11 | 0.00 | 0.10 | 5.93 | 1.29 | 11.62 | 0.22 |
| 30 | 34.42 | 26.66 | 6.26 | 8.17 | 0.09 | 0.94 | 0.12 | 0.01 | 0.24 | 4.02 | 1.18 | 9.50 | 0.29 |
| **50** | 34.55 | 22.21 | 5.96 | 8.09 | 0.13 | 1.26 | 0.62 | 0.17 | 5.30 | 4.90 | 6.73 | 10.84 | 1.37 |
| 60 | 34.58 | 21.54 | 5.69 | 8.07 | 0.08 | 1.08 | 0.31 | 0.31 | 5.58 | 10.22 | 6.96 | 22.53 | 0.68 |
| 70 | 34.62 | 20.01 | 5.48 | 8.05 | 0.09 | 0.99 | 0.34 | 0.40 | 5.58 | 7.36 | 6.97 | 20.44 | 0.95 |
| 80 | 34.61 | 19.75 | 5.48 | 8.04 | 0.01 | 0.90 | 0.36 | 0.21 | 6.15 | 8.21 | 7.26 | 20.39 | 0.88 |
| 100 | 34.63 | 19.19 | 5.31 | 8.03 | 0.05 | 0.95 | 0.32 | 0.12 | 7.13 | 9.52 | 8.20 | 25.74 | 0.86 |
| 150 | 34.60 | 16.81 | 5.27 | 7.97 | 0.06 | 0.87 | 0.55 | 0.02 | 9.01 | 14.54 | 9.90 | 18.12 | 0.68 |
| 180 | 34.56 | 15.81 | 5.23 | 7.96 | 0.03 | 1.44 | 0.61 | 0.03 | 9.80 | 16.43 | 11.26 | 18.39 | 0.69 |

**Supplementary Table 2.** Time course of the concentrations of NO3−, NH4+, PO43− and SiO42− during the field incubation experiments.

|  | **Groups** | **Time**  **(hours)** | **NH4+**  **(µM)** | **NO3− (µM)** | **PO43−**  **(µM)** | **SiO42− (µM)** |
| --- | --- | --- | --- | --- | --- | --- |
| Surface layer water incubations | Light | 0 | 1.54±0.29 | 0.18±0.12 | 0.33±0.00 | 5.71±1.48 |
| 24 | 1.01±0.33 | 0.08±0.03 | 0.36±0.19 | 3.80±1.11 |
| 48 | 1.38±0.13 | 0.09±0.08 | 0.32±0.12 | 5.88±1.40 |
| 72 | 1.26±0.17 | 0.06±0.02 | 0.32±0.11 | 6.85±2.20 |
| Nutrients + Light | 0 | 1.54±0.32 | 41.4±3.15 | 1.67±0.20 | 7.33±1.33 |
| 24 | 1.45±0.24 | 39.6±3.63 | 1.56±0.30 | 8.66±1.81 |
| 48 | 1.52±0.39 | 36.14±3.35 | 1.48±0.21 | 7.93±1.57 |
| 72 | 2.00±0.33 | 30.67±3.20 | 0.98±0.24 | 7.35±2.72 |
| DCM layer water incubations | 10% Light | 0 | 1.26±0.28 | 5.30±1.06 | 0.63±0.15 | 10.62±2.52 |
| 24 | 1.81±0.51 | 5.29±1.04 | 0.63±0.13 | 10.58±3.30 |
| 48 | 1.50±0.23 | 5.01±1.08 | 0.63±0.21 | 11.98±1.89 |
| 72 | 1.30±0.38 | 3.50±0.68 | 0.51±0.14 | 11.92±1.06 |
| Light | 0 | 1.26±0.28 | 5.30±0.58 | 0.63±0.15 | 10.62±1.52 |
| 24 | 1.75±0.39 | 5.03±0.16 | 0.64±0.34 | 8.61±2.15 |
| 48 | 0.81±0.07 | 3.81±0.40 | 0.55±0.40 | 7.64±2.14 |
| 72 | 1.73±0.41 | 0.43±0.23 | 0.42±0.17 | 5.16±2.46 |
| Nutrients + Light | 0 | 2.86±0.41 | 39.25±4.07 | 2.58±0.29 | 12.82±1.02 |
| 24 | 1.92±0.35 | 41.72±3.28 | 2.73±0.45 | 9.18±3.35 |
| 48 | 1.33±0.31 | 40.91±2.09 | 2.68±0.47 | 7.1±2.55 |
| 72 | 0.97±0.30 | 37.33±3.22 | 1.94±0.30 | 7.28±3.70 |

**Supplementary Table 3.** Time course of cell abundance of heterotrophic bacteria, Cyanobacteria (*Prochlorococcus* and *Synechococcus*), PPE (photosynthetic pico-eukaryotes) and PNE (photosynthetic nano-eukaryotes) during the field incubation experiments.

|  | **Groups** | **Time course**  **(h)** | **Total**  **(×104 cell ml-1)** | ***Prochlorococcus* (×104 cell ml-1)** | ***Synechococcus***  **(×104 cell ml-1)** | **Heterotrophic bacteria**  **(×104 cell ml-1)** | **PPE**  **(×103 cell ml-1)** | **PNE**  **(×103 cell ml-1)** |
| --- | --- | --- | --- | --- | --- | --- | --- | --- |
| Surface layer water incubations | Light | 0 | 1.04±0.25 | 0.34±0.05 | 0.04±0.05 | 0.65±0.16 | 0.69±0.07 | 0.52±0.06 |
| 24 | 0.72±0.14 | 0.28±0.05 | 0.02±0.05 | 0.41±0.05 | 1.72±0.89 | 0.20±0.10 |
| 48 | 0.68±0.14 | 0.26±0.03 | 0.02±0.04 | 0.40±0.06 | 1.70±0.63 | 0.10±0.07 |
| 72 | 0.35±0.20 | 0.08±0.09 | 0.03±0.06 | 0.24±0.05 | 1.40±0.91 | 0.80±0.04 |
| Nutrients + Light | 0 | 1.04±0.26 | 0.34±0.05 | 0.04±0.06 | 0.65±0.16 | 0.69±0.07 | 0.52±0.06 |
| 24 | 1.73±0.49 | 0.47±0.09 | 0.27±0.15 | 0.99±0.25 | 0.72±0.35 | 0.01±0.02 |
| 48 | 2.45±0.49 | 0.73±0.18 | 0.20±0.13 | 1.52±0.17 | 1.70±0.23 | 0.19±0.03 |
| 72 | 2.53±0.46 | 0.66±0.17 | 0.15±0.13 | 1.72±0.16 | 3.40±0.67 | 0.86±0.55 |
| DCM layer water incubations | 10% Light | 0 | 1.12±0.29 | 0.19±0.06 | 0.02±0.01 | 0.91±0.23 | 0.28±0.02 | 0.04±0.01 |
| 24 | 2.11±0.38 | 0.36±0.08 | 0.06±0.03 | 1.68±0.27 | 0.14±0.03 | 0.02±0.00 |
| 48 | 1.80±0.38 | 0.23±0.07 | 0.08±0.02 | 1.48±0.30 | 0.05±0.02 | 0.29±0.02 |
| 72 | 1.91±0.38 | 0.71±0.08 | 0.12±0.05 | 1.08±0.25 | 0.17±0.04 | 0.83±0.06 |
| Light | 0 | 1.12±0.30 | 0.19±0.06 | 0.02±0.01 | 0.91±0.23 | 0.28±0.02 | 0.04±0.01 |
| 24 | 2.35±0.46 | 0.32±0.09 | 0.44±0.09 | 1.59±0.28 | 1.18±0.54 | 0.16±0.01 |
| 48 | 3.06±0.49 | 0.54±0.09 | 0.60±0.14 | 1.92±0.26 | 3.08±0.47 | 1.50±0.01 |
| 72 | 3.30±0.86 | 0.82±0.47 | 0.68±0.11 | 1.79±0.28 | 3.47±0.47 | 2.31±0.12 |
| Nutrients + Light | 0 | 1.12±0.29 | 0.19±0.06 | 0.02±0.01 | 0.91±0.23 | 0.28±0.02 | 0.04±0.01 |
| 24 | 1.91±0.35 | 0.31±0.09 | 0.07±0.04 | 1.53±0.22 | 0.30±0.02 | 0.20±0.00 |
| 48 | 2.45±0.38 | 0.66±0.06 | 0.11±0.05 | 1.68±0.28 | 1.52±0.03 | 1.06±0.02 |
| 72 | 3.52±0.51 | 1.03±0.15 | 0.45±0.11 | 2.03±0.26 | 1.75±0.18 | 4.61±0.31 |

**Supplementary Table 4.** Time course of the alpha diversity indices of bacteria during the incubation experiments.

|  | **Groups** | **Time course**  **(h)** | **Observed_OTU** | **Shannon** | **Simpson** | **Chao1** | **ACE** |
| --- | --- | --- | --- | --- | --- | --- | --- |
| Surface layer water incubations | Light | 0 | 1076 | 6.41 | 0.95 | 1441.35 | 1411.48 |
| 24 | 994 | 4.24 | 0.76 | 1347.27 | 1347.23 |
| 48 | 868 | 6.39 | 0.97 | 1151.04 | 1188.81 |
| 72 | 736 | 6.43 | 0.98 | 937.07 | 979.36 |
| Nutrients + Light | 0 | 1076 | 6.41 | 0.95 | 1441.35 | 1411.48 |
| 24 | 815 | 6.14 | 0.96 | 1076.36 | 1052.34 |
| 48 | 748 | 5.46 | 0.94 | 937.18 | 945.38 |
| 72 | 870 | 6.16 | 0.96 | 1204.20 | 1223.57 |
| DCM layer water incubations | 10% Light | 0 | 1212 | 7.11 | 0.98 | 1532.76 | 1539.53 |
| 24 | 1667 | 9.14 | 1.00 | 1671.64 | 1682.87 |
| 48 | 710 | 4.44 | 0.88 | 1015.36 | 1087.39 |
| 72 | 800 | 5.34 | 0.92 | 1065.00 | 1093.27 |
| Light | 0 | 1212 | 7.11 | 0.98 | 1532.76 | 1539.53 |
| 24 | 957 | 5.98 | 0.94 | 1235.20 | 1271.87 |
| 48 | 890 | 6.08 | 0.95 | 1135.16 | 1130.63 |
| 72 | 901 | 6.20 | 0.96 | 1182.30 | 1220.33 |
| Nutrients + Light | 0 | 1212 | 7.11 | 0.98 | 1532.76 | 1539.53 |
| 24 | 920 | 6.63 | 0.97 | 1181.07 | 1192.10 |
| 48 | 708 | 5.69 | 0.95 | 921.03 | 939.30 |
| 72 | 781 | 5.32 | 0.93 | 1012.66 | 1084.88 |

**Supplementary Table 5.** Time course of the alpha diversity indices of eukaryotes during the incubation experiments.

|  | **Groups** | **Time course**  **(h)** | **Observed_OTU** | **Shannon** | **Simpson** | **Chao1** | **ACE** |
| --- | --- | --- | --- | --- | --- | --- | --- |
| Surface layer water incubations | Light | 0 | 1463 | 7.98 | 0.99 | 1575.73 | 1571.04 |
| 24 | 1095 | 7.38 | 0.98 | 1168.77 | 1166.01 |
| 48 | 976 | 7.22 | 0.97 | 1028.56 | 1027.92 |
| 72 | 602 | 4.25 | 0.84 | 667.06 | 677.64 |
| Nutrients + Light | 0 | 1463 | 7.98 | 0.99 | 1575.73 | 1571.04 |
| 24 | 1156 | 7.52 | 0.98 | 1229.51 | 1237.03 |
| 48 | 768 | 5.28 | 0.89 | 850.25 | 865.46 |
| 72 | 1135 | 7.69 | 0.99 | 1222.44 | 1233.30 |
| DCM layer water incubations | 10% Light | 0 | 1272 | 7.05 | 0.98 | 1345.10 | 1355.46 |
| 24 | 430 | 1.69 | 0.33 | 500.14 | 506.02 |
| 48 | 757 | 4.74 | 0.87 | 838.08 | 850.02 |
| 72 | 592 | 3.15 | 0.71 | 686.51 | 698.29 |
| Light | 0 | 1272 | 7.05 | 0.98 | 1345.10 | 1355.46 |
| 24 | 1191 | 7.35 | 0.98 | 1310.40 | 1307.34 |
| 48 | 784 | 5.72 | 0.94 | 856.66 | 870.26 |
| 72 | 975 | 5.72 | 0.94 | 1065.42 | 1078.85 |
| Nutrients + Light | 0 | 1272 | 7.05 | 0.98 | 1345.10 | 1355.46 |
| 24 | 1324 | 6.79 | 0.94 | 1403.57 | 1401.44 |
| 48 | 1031 | 5.44 | 0.90 | 1622.85 | 1248.52 |
| 72 | 463 | 3.55 | 0.80 | 524.32 | 531.57 |

**Supplementary Table 6.** Shifts in relative abundance (%) of major bacteria lineages during the incubation experiments.

|  | **Surface layer water incubations** | | | | | | | | **DCM layer water incubations** | | | | | | | | | | | |
| --- | --- | --- | --- | --- | --- | --- | --- | --- | --- | --- | --- | --- | --- | --- | --- | --- | --- | --- | --- | --- |
|  | **Light** | | | | **Nutrients + Light** | | | | **10% Light** | | | | **Light** | | | | **Nutrients + Light** | | | |
|  | **0** | **24** | **48** | **72** | **0** | **24** | **48** | **72** | **0** | **24** | **48** | **72** | **0** | **24** | **48** | **72** | **0** | **24** | **48** | **72** |
| Gammaproteobacteria | 24.14 | 52.88 | 40.33 | 20.91 | 24.14 | 32.83 | 41.1 | 18.82 | 17.89 | 30.53 | 57.59 | 21.16 | 17.89 | 19.65 | 32.5 | 15.15 | 17.89 | 27.53 | 30.46 | 18.48 |
| Alphaproteobacteria | 20.15 | 10.15 | 23.57 | 35.46 | 20.15 | 20.16 | 33.88 | 31.49 | 14.49 | 17.43 | 36.11 | 21.72 | 14.49 | 48.00 | 13.73 | 17.02 | 14.49 | 47.99 | 35.8 | 33.96 |
| Cyanobacteriia | 30.69 | 18.05 | 15.44 | 25.08 | 30.69 | 27.52 | 15.59 | 21.92 | 8.19 | 1.18 | 2.00 | 47.86 | 8.19 | 11.85 | 43.76 | 44.08 | 8.19 | 3.46 | 23.27 | 34.93 |
| Thermoplasmata | 7.53 | 1.45 | 1.32 | 0.09 | 7.53 | 2.45 | 0.01 | 4.30 | 24.45 | 0.10 | 0.03 | 0.02 | 24.45 | 7.54 | 1.83 | 6.38 | 24.45 | 1.13 | 0.37 | 0.01 |
| Nitrososphaeria | 0.03 | 0.05 | 0.03 | 0.01 | 0.03 | 0.02 | 0.02 | 0.02 | 7.66 | 5.38 | 0.57 | 1.54 | 7.66 | 2.85 | 0.95 | 0.45 | 7.66 | 6.42 | 3.83 | 3.42 |
| Clostridia | 0.15 | 0.07 | 0.13 | 0.12 | 0.15 | 0.71 | 1.59 | 0.16 | 0.14 | 7.55 | 0.14 | 0.11 | 0.14 | 0.19 | 0.08 | 0.04 | 0.14 | 0.18 | 0.10 | 0.08 |
| Bacteroidia | 1.81 | 3.22 | 4.13 | 3.74 | 1.81 | 2.95 | 1.91 | 5.79 | 1.47 | 7.10 | 0.42 | 0.53 | 1.47 | 1.03 | 0.92 | 1.38 | 1.47 | 2.34 | 0.62 | 0.63 |
| Acidimicrobiia | 3.94 | 3.59 | 3.05 | 3.50 | 3.94 | 2.96 | 0.66 | 6.43 | 4.50 | 1.09 | 0.31 | 0.42 | 4.50 | 1.98 | 1.15 | 0.71 | 4.50 | 2.01 | 0.97 | 0.30 |
| Bacilli | 0.19 | 0.07 | 0.09 | 0.06 | 0.19 | 0.10 | 0.12 | 0.08 | 0.17 | 5.16 | 0.09 | 0.09 | 0.17 | 0.08 | 0.11 | 0.05 | 0.17 | 0.04 | 0.03 | 0.09 |
| Actinobacteria | 0.41 | 0.13 | 0.07 | 0.04 | 0.41 | 0.09 | 0.22 | 0.09 | 0.48 | 2.51 | 0.07 | 0.11 | 0.48 | 0.06 | 0.07 | 0.15 | 0.48 | 0.04 | 0.02 | 0.12 |
| Others | 10.95 | 10.34 | 11.85 | 11.00 | 10.95 | 10.22 | 4.91 | 10.9 | 20.59 | 21.97 | 2.66 | 6.44 | 20.59 | 6.78 | 4.90 | 14.58 | 20.59 | 8.86 | 4.54 | 7.97 |

**Supplementary Table 7.** Shifts in relative abundance (%) of major planktonic eukaryotic lineages during the incubation experiments.

|  | **Surface layer water incubations** | | | | | | | | **DCM layer water incubations** | | | | | | | | | | | |
| --- | --- | --- | --- | --- | --- | --- | --- | --- | --- | --- | --- | --- | --- | --- | --- | --- | --- | --- | --- | --- |
|  | **Light** | | | | **Nutrients + Light** | | | | **10% Light** | | | | **Light** | | | | **Nutrients + Light** | | | |
|  | **0** | **24** | **48** | **72** | **0** | **24** | **48** | **72** | **0** | **24** | **48** | **72** | **0** | **24** | **48** | **72** | **0** | **24** | **48** | **72** |
| Dinophyceae | 34.36 | 10.05 | 18.61 | 1.07 | 34.36 | 21.81 | 22.61 | 5.27 | 30.29 | 3.00 | 1.71 | 0.14 | 30.29 | 8.29 | 1.55 | 3.31 | 30.29 | 22.77 | 5.84 | 0.30 |
| Mamiellophyceae | 7.59 | 1.53 | 0.8 | 68.64 | 7.59 | 0.30 | 10.61 | 50.27 | 15.59 | 2.67 | 0.98 | 0.26 | 15.59 | 15.12 | 13.31 | 25.80 | 15.59 | 3.82 | 1.02 | 6.29 |
| Bacillariophyceae | 1.46 | 4.86 | 2.16 | 14.73 | 1.46 | 2.34 | 7.59 | 8.39 | 2.68 | 10.04 | 5.6 | 10.80 | 2.68 | 10.20 | 34.55 | 25.06 | 2.68 | 4.18 | 16.78 | 8.99 |
| Mediophyceae; | 4.06 | 22.02 | 2.17 | 13.53 | 4.06 | 2.36 | 10.31 | 12.54 | 5.89 | 60.14 | 69.3 | 83.03 | 5.89 | 11.33 | 31.09 | 23.04 | 5.89 | 8.87 | 52.60 | 77.22 |
| MASTs | 3.82 | 4.41 | 9.67 | 2.94 | 3.82 | 11.37 | 5.17 | 1.14 | 1.90 | 1.95 | 0.94 | 0.43 | 1.90 | 2.09 | 1.29 | 2.37 | 1.90 | 2.89 | 0.84 | 0.31 |
| Dinoflagellata | 2.70 | 0.66 | 2.07 | 0.05 | 2.70 | 2.11 | 2.01 | 0.43 | 1.38 | 0.08 | 0.12 | 0.04 | 1.38 | 0.67 | 0.12 | 0.28 | 1.38 | 1.62 | 0.20 | 0.03 |
| Ciliophora | 2.36 | 3.62 | 1.81 | 0.21 | 2.36 | 1.83 | 2.87 | 0.28 | 1.01 | 0.41 | 0.41 | 0.14 | 1.01 | 1.10 | 0.88 | 0.39 | 1.01 | 2.56 | 0.70 | 0.07 |
| Retaria | 5.49 | 0.84 | 2.18 | 0.1 | 5.49 | 1.09 | 0.89 | 0.25 | 10.09 | 0.73 | 0.60 | 0.21 | 10.09 | 5.30 | 0.56 | 0.39 | 10.09 | 8.87 | 1.26 | 0.16 |
| fungi | 0.28 | 5.85 | 0.14 | 0.09 | 0.28 | 0.10 | 0.22 | 0.03 | 0.15 | 15.01 | 0.07 | 0.16 | 0.15 | 2.63 | 0.06 | 0.02 | 0.15 | 0.48 | 0.30 | 0.17 |
| Cercozoa | 0.05 | 0.03 | 0.18 | 0.02 | 0.05 | 0.05 | 0.14 | 0.04 | 0.05 | 0.07 | 0.01 | 0.00 | 0.05 | 0.07 | 0.03 | 0.02 | 0.05 | 0.14 | 0.25 | 0.02 |
| Haptophyta | 0.01 | 0.00 | 0.06 | 0.00 | 0.01 | 0.04 | 0.02 | 0.02 | 0.01 | 0.00 | 0.00 | 0.00 | 0.01 | 0.01 | 0.01 | 0.01 | 0.01 | 0.01 | 0.01 | 0.00 |
